# Supplementary material for: Genome-resolved metagenomics of eukaryotic populations during early colonization of premature infants and in hospital rooms
Source: PubMed Central journal article supplement (PMC6377789; doi:10.1186/s40168-019-0638-1), 2019-02-15

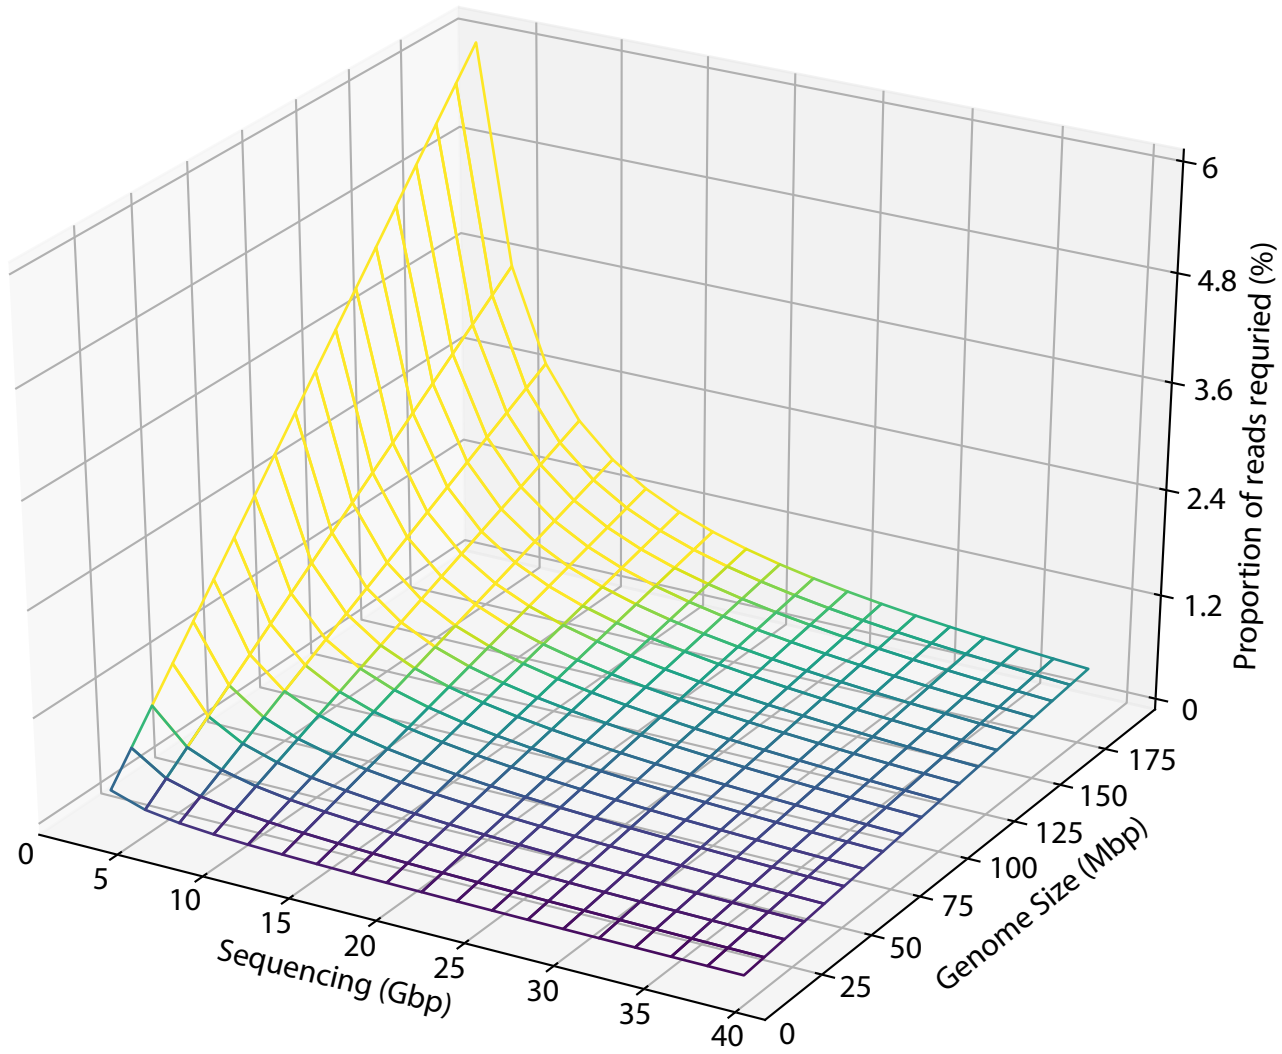

Supplement: 40168_2019_638_MOESM6_ESM.pdf [file 40168_2019_638_MOESM6_ESM.pdf]
